# Supplementary material
Source: MDPI journal article supplement (https://www.mdpi.com/2073-4395/12/12/2932)
Supplement: s1 [file s1]

**Table S1.** List of ISSR primers used for Genetic Diversity and varietal identification among 14 banana varieties from Pakistan.

| Sr. No | Primer Code | Primer Sequence 5' – 3'  | Annealing Temperature | Reference |
|--------|-------------|--------------------------|-----------------------|-----------|
| 1      | UBC-823     | TCTCTCTCTCTCTCC          | 55°C                  | [1]       |
| 2      | UBC-808     | AGAGAGAGAGAGAGAGC        | 55°C                  | [1]       |
| 3      | UBC-812     | GAGAGAGAGAGAGAGAA        | 56°C                  | [1]       |
| 4      | UBC-809     | AGAGAGAGAGAG AGAGG       | 55°C                  | [1]       |
| 5      | UBC-864     | ATGATGATGATGATGATG       | 55°C                  | [2]       |
| 6      | UBC-834     | AGAGAGAGAGAGAGAGTT       | 55°C                  | [2]       |
| 7      | UBC-842     | GAGAGAGAGAGAGAGATG       | 56°C                  | [3]       |
| 8      | UBC-841     | GAGAGAGAGAGAGAGATC       | 56°C                  | [3]       |
| 9      | UBC-840     | GAGAGAGAGAGAGAGATT       | 55°C                  | [3]       |
| 10     | UBC-826     | ACACACACACACACC          | 56°C                  | [3]       |
| 11     | UBC-811     | GAGAGAGAGAGAGAGAC        | 55°C                  | [3]       |
| 12     | UBC-835     | AGAGAGAGAGAGAGAGCC       | 56°C                  | [3]       |
| 13     | UBC-836     | AGAGAGAGAGAGAGAGCA       | 56°C                  | [3]       |
| 14     | UBC-815     | CTCTCTCTCTCTCTG          | 55°C                  | [3]       |
| 15     | UBC-818     | CACACACACACACAG          | 55°C                  | [3]       |
| 16     | UBC-807     | AGAGAGAGAGAGAGAGT        | 55°C                  | [3]       |
| 17     | UBC-880     | GGAGAGGAGAGGAGA          | 55°C                  | [3]       |
| 18     | UBC-810     | GAGAGAGAGAGAGAGAT        | 58°C                  | [3]       |
| 19     | UBC-827     | ACACACACACACACG          | 55°C                  | [3]       |
| 20     | UBC-857     | ACACACACACACACTG         | 55°C                  | [4]       |
| 21     | UBC-854     | TCTCTCTCTCTCTCAG         | 58°C                  | [4]       |
| 22     | UBC-813     | CTCTCTCTCTCTCTT          | 55°C                  | [5]       |
| 23     | UBC-847     | CACACACACACACAAC         | 55°C                  | [5]       |
| 24     | UBC-848     | CACACACACACACAGG         | 55°C                  | [5]       |
| 25     | UBC-817     | CACACACACACACAA          | 55°C                  | [5]       |
| 26     | DBD         | ACACACACACACAC           | 55°C                  | [6]       |
| 27     | IG-O5       | GACAGACAGACAGACA         | 55°C                  | [7]       |
| 28     | IG-O3       | GAGGGTGGAGGATCT          | 55°C                  | [7]       |
| 29     | IG-O2       | AGAGGTGGGCAGGTGG         | 55°C                  | [7]       |
| 30     | IG-19       | ACACACACACACTGG          | 55°C                  | [7]       |
| 31     | IG-23       | GTGTGTGTGTGTGTACG        | 58°C                  | [7]       |
| 32     | UBC-844     | CTCTCTCTCTCTCTGC         | 55°C                  | [8]       |
| 33     | ISSR- 1     | GAGAGAGAGAGAGAGAGAC      | 58°C                  | [9]       |
| 34     | UBC-822     | TCTCTCTCTCTCTCTCG        | 55°C                  | [9]       |
| 35     | ISSR- 2     | GAGAGAGAGAGAGAGAGAA<br>C | 55°C                  | [9]       |
| 36     | UBC-861     | ACCACCACCACCACCT         | 55°C                  | [9]       |
| 37     | ISSR- 3     | CCTCCTCCTCCTCCTT         | 55°C                  | [9]       |
| 38     | UBC-868     | AAGAGGAGGAGGAGGAGG       | 52°C                  | [9]       |
| 39     | ISSR -4     | AACAACAACAACACCC         | 53°C                  | [9]       |
| 40     | UBC-862     | AGCAGCAGCAGCAGCAGCT      | 53°C                  | [9]       |

## References:

1. Chandra Das, S.; Balamohan, T.N.; Poornima, K.; Bergh, I.V.D. Evaluation of Genetic Diversity in Some Banana Hybrids Using ISSR Markers. *Int.J.Curr.Microbiol.App.Sci* **2018**, *7*, 146–157, doi:10.20546/ijcmas.2018.701.016.
2. Silva, A.V.C.; Nascimento, A.L.S.; Vitória, M.F.; Rabbani, A.R.C.; Soares, A.N.R.; Lédo, A.S. Diversity and Genetic Stability in Banana Genotypes in a Breeding Program Using Inter Simple Sequence Repeats (ISSR) Markers. *Genet. Mol. Res.* **2017**, *16*, doi:10.4238/gmr16019402.
3. Swain, S.; Das, S.; Munsi, P.S.; Lenka, P.C.; Rout, G.R.; Swain, D. Molecular Diversity Study on Dessert Banana Genotypes (Musa Spp.) from Odisha Using ISSR Markers. *13*.
4. Lamare, A.; Rao, S.R. Efficacy of RAPD, ISSR and DAMD Markers in Assessment of Genetic Variability and Population Structure of Wild Musa Acuminata Colla. **2015**, *10*.
5. Lu, Y.; Zhang, X.; Pu, J.; Qi, Y.; Xie, Y. Molecular Assessment of Genetic Identity and Genetic Stability in Banana Cultivars (Musa Spp.) from China Using ISSR Markers. *7*.
6. Thangavelu, R.; Kumar, K.M.; Devi, P.G.; Mustaffa, M.M. Genetic Diversity of Fusarium Oxysporum f.Sp. Cubense Isolates (Foc) of India by Inter Simple Sequence Repeats (ISSR) Analysis. *Mol Biotechnol* **2012**, *51*, 203–211, doi:10.1007/s12033-011-9457-8.
7. Rout, G.R.; Senapati, S.K.; Aparajita, S.; Palai, S.K. Studies on Genetic Identification and Genetic Fidelity of Cultivated Banana Using ISSR Markers. *9*.
8. Racharak, P.; Eiadthong, W. Genetic Relationship among Subspecies of Musa Acuminata Colla and A-Genome Consisting Edible Cultivated Bananas Assayed with ISSR Markers. **2007**, *29*, 12.
9. Godwin, I.D.; Aitken, E.A.B.; Smith, L.W. Application of Inter Simple Sequence Repeat (ISSR) Markers to Plant Genetics. *Electrophoresis* **1997**, *18*, 1524–1528, doi:10.1002/elps.1150180906.
